# Supplementary material for: Diagnosing O 3 formation and O 3 -NO X -VOC sensitivity in a heavily polluted megacity of central China: A multi-method systematic evaluation over the warm seasons from 2019 to 2021
Source: Copernicus journal article supplement (doi:10.5194/egusphere-2024-4178), 2025-02-06
Supplement: Supplementary file [file egusphere-2024-4178-AC1-supplement.pdf]

**Manuscript number:** EGUSPHERE-2024-4178

**Title:** Diagnosing O<sub>3</sub> formation and O<sub>3</sub>-NO<sub>x</sub>-VOC sensitivity in a heavily polluted megacity of central China: A multi-method systematic evaluation over the warm seasons from 2019 to 2021

Yu et al. analyzed the two-year routine hourly measurement data from a municipal environmental monitoring station in Zhengzhou City, China. Using PMF and CMAQ, they found that O<sub>3</sub> formation was primarily driven by VOC emissions from the transportation sectors. Furthermore, they deployed an OBM model to provide insights into the equilibrium of free radicals. Based on the analysis, the authors claim that the O<sub>3</sub> formation is limited by VOCs.

The current version is long to read and poorly written. Some terminologies are badly defined or not consistent throughout the manuscript. The PMF analysis is not technically sound, and the study reads like a measurement report overall. In addition, the comparison between studies is limited to other Chinese studies. I don't think readers from countries other than China could benefit from the findings. Considering the work lacks a broad readership, I suggest rejecting the manuscript.

**Response:** Thank you for your careful reading of our paper and the valuable comments and constructive suggestions. Below are the point-to-point responses to all the comments (The comments are marked in black font and the responses are marked in dark blue font). The major changes that have been made according to these responses were marked in yellow color in the highlighted copy of the revised manuscript. And our own minor changes were marked in red font. Note that the following line numbers are shown in the corrected version.

**Major Comments:**

1. Introduction is long and reads very descriptive. It is hard to see the novelty and importance of the work. I will suggest the authors make it compact and concise and, at the same time, highlight the novelty and importance of the study.

**Response:** We sincerely appreciate the reviewer's insightful feedback. In response to your suggestions, we have made comprehensive revisions to the Introduction section, which include the following improvements:

Conciseness: The original text has been streamlined from 1,100 to 850 words, with professional language editing services applied to enhance clarity and readability.

Global Perspective: We have broadened the international scope by systematically comparing the progress of ozone pollution mechanism research in both domestic (China) and international contexts (e.g., the EU, and USA). This revision better situates our work within the global research landscape.

Three key research gaps are identified: (1) Most observational studies focus on short-term pollution events and lack continuous tracking of VOC compositional dynamics across different ozone levels. (2) While VOC source apportionment is well-explored, ozone source attribution remains insufficiently addressed. (3) The limitations of single-method approaches for identifying ozone sensitivity emphasize the need for integrated multi-method frameworks.

These revisions collectively sharpen the focus on the innovative contributions of our study. First, it conducts a comprehensive analysis of the pollution characteristics and formation mechanisms of ozone and VOCs based on three years of data. This fills the gap in current research, which tends to focus on short-term pollution events, by providing continuous, dynamic information on pollution trends. Second, the study utilizes the CMAQ and PMF models to conduct source apportionment of ozone and its precursor VOCs. This multi-model approach allows for a more detailed identification of pollution sources, enhancing the accuracy of source analysis. Finally, the study employs a multi-method approach to assess ozone sensitivity, overcoming the limitations of using a single method. By integrating different methods, the study offers a more comprehensive and accurate evaluation of ozone sensitivity. These innovations contribute to a deeper understanding of ozone pollution and its formation mechanisms, while also providing valuable insights for refining ozone.

2. Lines 316 – 324: The way how VOC species were included in the PMF analysis seems subjective. How did the author define the high frequency of concentrations below MDL? What are local emissions? How do they contribute to abnormally high concentrations? Which VOC compounds had abnormally high concentrations? Do they always exhibit abnormally high concentrations? Why is the signal-to-noise threshold defined as 5?

**Response:** Thank you very much for your valuable comments. I would like to provide a detailed response to your queries as follows:

Regarding the selection of VOC species for the PMF analysis, we followed several principles based on the manual published by the EPA to ensure the scientific rigor and validity of our data: (1) We prioritized VOC species with relatively high concentrations to ensure that their signals could be effectively separated during the analysis. (2) We selected species that are commonly recognized as emission tracers (e.g., isoprene) to help accurately trace the pollution sources. (3) We excluded species with more than 25% missing data or concentrations below the method detection limit (MDL) to avoid analysis bias caused by incomplete or very low data. (4) Species with a signal-to-noise ratio (S/N) lower than 0.5 were also excluded to ensure that only species with sufficient signal strength were included in the analysis. I have updated the relevant content in section 2.3.2, as shown below.

The species selection of PMF is performed based on the following principles: (1) prioritizing VOC species with higher concentrations for effective signal separation; (2) selecting emission tracers like isoprene to accurately trace pollution sources; (3) excluding species with over 25% missing data or concentrations below the method detection limit (MDL) to avoid bias; (4) excluding species with a signal-to-noise ratio (S/N) below 0.5 to ensure adequate signal strength.

Regarding the high concentration issue mentioned in the manuscript, we observed that there were occasional spikes in concentrations of compounds such as trichloromethane. After further investigation, we concluded that these anomalies were due to specific laboratory emissions. Therefore, these outliers were removed during the data cleaning process and were not included in the overall analysis of the paper. I also apologize for the confusion regarding the signal-to-noise threshold. In the original manuscript, we mistakenly mentioned the threshold as 5, but it should have been 0.5. We have corrected this in the revised version.

3. Lines 325 – 332: The current description for selecting PMF factor solution is vague. Why was  $Q/Q_{exp}$  not chosen to find the optimal factor solution? This is a well-established variable for searching for the factor solution. The ideal

solution should provide a  $Q/Q_{exp}$  close to 1.0. The change in  $Q/Q_{exp}$  as a function of the number of factors should be presented as a figure in the Supplement. In addition, no uncertainty estimation method (e.g., bootstrap, displacement) is mentioned to examine the solution's robustness. Is the chosen PMF solution for presentation robust enough?

**Response:** Thank you for your valuable comments on our manuscript, and we appreciate the opportunity to address your concerns.

Regarding the selection of the PMF factor solution, we identified a six-factor solution based on the method described by Ulbricht et al. (2009). Specifically, we utilized two key parameters to determine the optimal number of factors: (1)  $Q_{true}/Q_{robust}$  values and (2)  $Q_{true}/Q_{theoretical}$  values. These parameters have been successfully applied in previous studies, including one of my own published works, to assess the appropriateness of the chosen factor solution. We will include a figure in the Supplement that demonstrates the change in  $Q/Q_{exp}$  as a function of the number of factors, as this can offer additional clarity to the decision-making process.

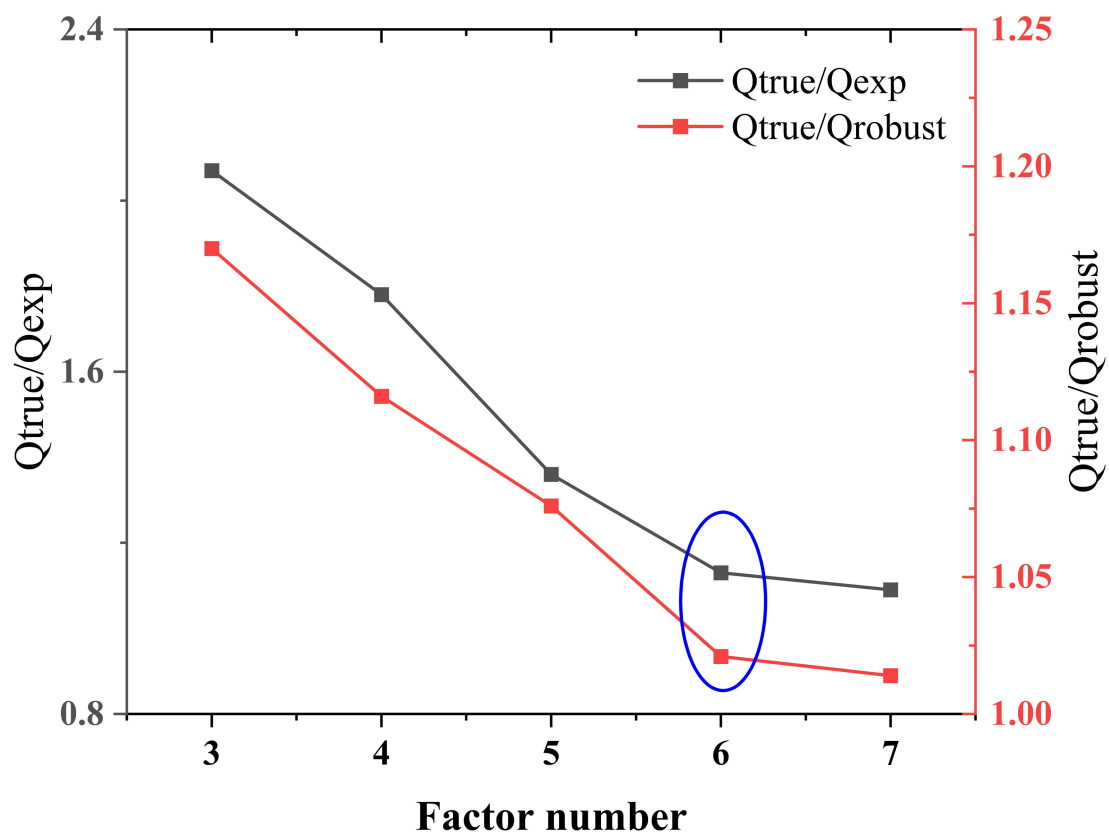

**Fig. S3** The ratios of  $Q_{true}/Q_{robust}$  and  $Q_{true}/Q_{exp}$  at factor size ranged from 3–7.

Thank you very much for your valuable comments, and we have added uncertainty

estimation methods (bootstrap method and displacement method). As shown in Table S3, the stability assessment of the six-factor solution of PMF by Bootstrap resampling (BS) and parametric displacement test (DISP) shows that the solution has high statistical robustness.

Table S3 Evaluating the robustness of the solution using bootstrap and displacement tests

| Diagnostics  | 3 factors  | 4 factors  | 5 factors  | 6 factors  | 7 factors  |
|--------------|------------|------------|------------|------------|------------|
| DISP % dQ    | 0          | 0          | 0          | 0          | 0          |
| DISP % swaps | 0          | 0          | 0          | 0          | 0          |
| BS Mapping   |            |            | Factor 5   |            | Factor 5   |
| <80%         |            |            | (62%)      |            | (69%)      |
| BS-DISP      | Successful | Successful | Successful | Successful | Successful |

- Lines 336 – 346: Several terminologies are badly defined. What concentrations are considered high O<sub>3</sub> values? What concentration is the national secondary standard limit? This needs to be highlighted as a horizontal line in Figure 1. What is defined as moderate, high, or severe pollution days? Is it based on the concentration of O<sub>3</sub> or PM<sub>2.5</sub>? Was the downward trend statistically significant?

**Response:** This study focuses on the period from May to September, during which ozone pollution frequently occurs. The high ozone value zone in this study is defined as the number of days with ozone levels exceeding the standard, specifically when the 8-hour average ozone concentration (MDA8) exceeds 160  $\mu\text{g}/\text{m}^3$ , which is above the national secondary standard (GB3095-2012). Figure 1 has been updated to reflect this, and a horizontal line has been added to highlight the trend of ozone concentration. Regarding the classification of pollution levels, the standards are as follows: Mild pollution: MDA8 > 160  $\mu\text{g}/\text{m}^3$ ; Moderate pollution: MDA8 > 215  $\mu\text{g}/\text{m}^3$ ; Severe pollution: MDA8 > 265  $\mu\text{g}/\text{m}^3$ . These thresholds are based on ozone concentration, not PM<sub>2.5</sub> levels. Moreover, the downward trend in ozone concentration observed in the study was statistically significant. To avoid causing confusion for readers, we have revised this section and updated Figure 1 in accordance with the reviewer's suggestions.

The results indicate severe photochemical pollution in the period from May to September during the years 2019-2021 (in Fig. 1). According to the GB 3095-2012 standard, the maximum daily average 8 h (MDA8) O<sub>3</sub> concentrations exceeding 160  $\mu\text{g}/\text{m}^3$  and 160  $\mu\text{g}/\text{m}^3$  are categorized as light pollution and moderate pollution,

respectively. The proportion of days with  $O_3$  concentrations exceeding  $160 \mu\text{g}/\text{m}^3$  was as high as 45%, with days classified as moderate or higher pollution accounting for 7%. The MDA8 was recorded on June 6, 2021 ( $285 \mu\text{g}/\text{m}^3$ ), with a severe pollution level. The proportion of MDA8  $O_3$  concentrations exceeding the standard during sampling periods from 2019 to 2021 was 53%, 37%, and 36%, showing a downward trend but still indicating severe  $O_3$  pollution.

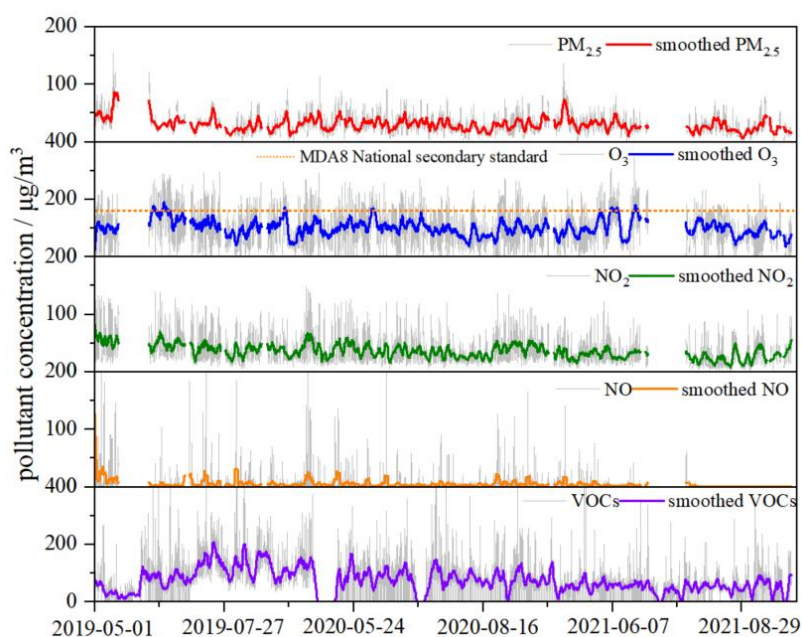

**Fig.1** Smoothing the Time Series of Pollutants. Savitzky-Golay smoothing denoising method was employed to facilitate a clearer and more intuitive observation of pollutant trends, with the window size set to 50 points and the polynomial order configured to 1.

5. Lines 347 – 363: The Pearson correlation coefficient is a correlation coefficient that measures the linear correlation between two variables. Therefore, a low Pearson correlation coefficient indicates that the linear correlation is weak, but it does not necessarily imply that the non-linear correlation is also weak. In addition, the correlation between  $O_3$  and its precursors only makes sense if the meteorological conditions have been normalized. I highly recommend the authors choose a proper statistical method to analyze the relationships between variables.

**Response:** First of all, we would like to sincerely thank you for your valuable feedback. We fully understand that the Pearson correlation coefficient primarily measures the linear relationship between two variables, and that a lower Pearson

correlation does not necessarily imply no relationship between the variables; there may be a non-linear relationship. Therefore, in the revised version of our manuscript, we will include a discussion on the limitations of the Pearson correlation coefficient and consider using other statistical methods (such as the Spearman rank correlation or Kendall's tau) to assess potential non-linear relationships. We believe this will contribute to a more comprehensive understanding of the relationships between variables. The relevant details will be added in Appendix Tables S4 and S5. It is worth noting that the results obtained using these methods are consistent with those of the Pearson correlation, further enhancing the robustness of our analysis.

Regarding the correlation between O<sub>3</sub> and its precursors, we agree with your suggestion that meteorological conditions should be taken into account in the analysis. Based on this, we will emphasize the importance of meteorological conditions in the analysis and mention. In another paper we are currently working on, machine learning methods (such as XGBoost and Random Forest) have been used to identify the contribution of meteorological factors to O<sub>3</sub> formation. Our research shows that meteorological conditions account for 58.3% of the total contribution to O<sub>3</sub> formation, which provides an important basis for further refining the analysis in this study.

#### **Minor Comments:**

1. Lines 73 – 79: The authors listed two studies from Taichung and Wuhan as examples. Readers not familiar with Chinese geography have no clue about these two cities. Proper descriptions need to be provided for these two example cities. Lines 91 – 93: Some descriptions need to be provided for Henan here.

**Response:** Thanks for your valuable suggestions. The introduction section has been rewritten.

2. Line 100: What are the transition zones?

**Response:** The transition zone in ozone sensitivity refers to the region where ozone production is highly responsive to changes in both volatile organic compounds (VOCs) and nitrogen oxides (NO<sub>x</sub>). This zone lies between the VOCs-dominated and

NO<sub>x</sub>-dominated areas, where the ratio of VOCs to NO<sub>x</sub> approaches a critical threshold for photochemical reactions. Within this zone, ozone production is influenced by the combined effects of VOCs and NO<sub>x</sub>, exhibiting a nonlinear response. For instance, reducing NO<sub>x</sub> alone can sometimes lead to an increase in ozone levels. Similarly, reducing VOCs alone may only result in a modest reduction in ozone concentrations, due to the inhibition of free radical chain reactions.

3. Lines 171 – 172: How often was the particulate removal device cleaned? I am concerned that during high pollution periods in China, the removal device can be saturated with high aerosol mass loading very quickly.

**Response:** Thank you for your comment. As per the HJ1012-2018 technical standards and the equipment manual, the particulate removal device, including the PM<sub>2.5</sub> cutter and sampling head, is cleaned at least once a month. During high pollution events, such as sandstorms or periods when PM<sub>2.5</sub> concentrations exceed 300 μg/m<sup>3</sup>, cleaning is performed within 24 hours after the pollution event to prevent particle deposition and blockage in the system. Additionally, the online monitoring system (TH-300B) incorporates advanced features such as dynamic pulse backflushing and hydrophobic coating to mitigate the impact of high aerosol mass loading and maintain operational efficiency during periods of high pollution.

4. Section 2.1: How many VOC species were identified?

**Response:** Thank you for your valuable comment. In Section 2.1, we analyzed 108 VOC species using both the TO-15 and PAMS methods. The TO-15 method (U.S. EPA Method TO-15) is designed to target 65 non-polar and weakly polar toxic VOCs, such as halogenated hydrocarbons and light alkanes, by utilizing canister sampling and GC-MS. The PAMS method, on the other hand, focuses on 56 photochemically reactive organic compounds which are key to ozone and secondary organic aerosol formation. These methods were selected to comprehensively capture a wide range of VOC species relevant to air quality monitoring.

5. Lines 367 – 369: “Nighttime short-term... the next day (Du et al., 2024).” are redundant.

**Response:** Thank you for your comment. We appreciate your feedback. As suggested, we have removed the redundant sentence "Nighttime short-term... the next day (Du et al., 2024)" to avoid repetition and improve the clarity of the manuscript.

6. Table 1: How many hours or days are defined as non-pollution, lightly pollution, and moderately pollution periods? What are the definitions of non-pollution, lightly pollution, and moderately pollution periods?



**Response:** Thank you for your comment. According to the "Ambient Air Quality Standards" (GB 3095-2012), the thresholds for ozone pollution levels are defined as follows: mild pollution, moderate pollution, and severe pollution based on the MDA8 (Maximum Daily 8-Hour Average) concentrations of 160  $\mu\text{g}/\text{m}^3$ , 215  $\mu\text{g}/\text{m}^3$ , and 265  $\mu\text{g}/\text{m}^3$ , respectively. In our study, the non-pollution period is defined as MDA8 concentrations below 160  $\mu\text{g}/\text{m}^3$ , the lightly polluted period as MDA8 concentrations between 160  $\mu\text{g}/\text{m}^3$  and 215  $\mu\text{g}/\text{m}^3$ , and the moderately polluted period as MDA8 concentrations between 215  $\mu\text{g}/\text{m}^3$  and 265  $\mu\text{g}/\text{m}^3$ . These definitions align with the national standards for categorizing ozone pollution levels.

The content of Table 1 has been updated, with the proportions of days categorized as non-polluted, light pollution, and moderate or higher pollution being 58%, 45%, and 7%, respectively.

7. Lines 374 – 376: “The daily average... non-pollution days”. Is it the difference statistically significant?

**Response:** I apologize for any inconvenience caused. The purpose of this statement is to describe that, daily average  $\text{PM}_{2.5}$  concentrations on ozone-polluted days exceeded those on non-polluted days.

8. Lines 382 – 383: How did the author determine the atmospheric oxidation capacity and free radical concentrations? I find the statement is very speculative.

**Response:** Sorry for the mistake. We have revised the statement as follows: This may be attributed to the fact that, under  $\text{O}_3$ -polluted conditions, atmospheric oxidation capacity could potentially be enhanced, with possibly elevated concentrations of both  $\text{O}_3$  and free radicals that might accelerate  $\text{NO}$  consumption.

9. Lines 386 – 387: What is the contribution of the top 20 substances to the total VOC concentrations?

**Response:** Thank you for your valuable feedback. The feedback has been used to update the content of Table 2. The top 20 substances account for 68.9% to 76.9%.

| Non-pollution   | Ave $\pm$<br>SD   | Lightly         | Ave $\pm$<br>SD   | Moderately      | Ave $\pm$<br>SD  |
|-----------------|-------------------|-----------------|-------------------|-----------------|------------------|
| Dichloromethane | 6.7 $\pm$<br>12.6 | Dichloromethane | 6.4 $\pm$<br>15.6 | Dichloromethane | 7.6 $\pm$<br>7.7 |
| Ethane          | 5.5 $\pm$ 4       | Acetone         | 6.2 $\pm$ 4.5     | Acetone         | 7.2 $\pm$<br>4.7 |
| Acetone         | 5.1 $\pm$ 5.9     | Ethane          | 5.4 $\pm$ 2.8     | n-Hexane        | 6 $\pm$ 27.3     |
| Propane         | 4.4 $\pm$ 3.2     | Isopentane      | 4.9 $\pm$ 4.7     | Ethane          | 5.5 $\pm$<br>2.9 |

|                      |            |                      |           |                     |           |
|----------------------|------------|----------------------|-----------|---------------------|-----------|
| n-Hexane             | 4.1 ± 10.6 | n-Hexane             | 4.5 ± 7.7 | Isopentane          | 5.4 ± 4   |
| Isopentane           | 4 ± 3.6    | Propane              | 4.1 ± 3.5 | 1,2-Dichloroethane  | 4 ± 3.2   |
| n-Butane             | 4 ± 3.5    | n-Butane             | 3.8 ± 3.4 | Propane             | 3.7 ± 2.2 |
| 1,2-Dichloroethane   | 3.6 ± 5.2  | 1,2-Dichloroethane   | 3.7 ± 3.4 | Toluene             | 3.4 ± 2.9 |
| Toluene              | 3.5 ± 3.7  | Toluene              | 3.4 ± 3.5 | n-Butane            | 3.3 ± 2.5 |
| m/p-Xylene           | 3.2 ± 4.3  | m/p-Xylene           | 3.1 ± 4   | m/p-Xylene          | 3.3 ± 3.7 |
| Trichloromethane     | 2.9 ± 5.3  | Trichloromethane     | 2.8 ± 3.2 | Trichloromethane    | 2.8 ± 1.8 |
| Naphthalene          | 2.4 ± 4.7  | Tetrachloroethylene  | 2.7 ± 3.6 | Benzene             | 2.6 ± 1.8 |
| Benzene              | 2.3 ± 1.7  | Acetylene            | 2.5 ± 3   | Tetrachloroethylene | 2.6 ± 3   |
| Acetylene            | 2.3 ± 1.9  | Benzene              | 2.5 ± 2   | n-Pentane           | 2.4 ± 1.9 |
| Isobutane            | 2.2 ± 1.9  | n-Pentane            | 2.3 ± 2   | Acetylene           | 2.4 ± 1.5 |
| n-Pentane            | 2.1 ± 1.7  | Vinyl acetate        | 2.2 ± 3.3 | Isoprene            | 2.3 ± 3.1 |
| Ethylene             | 1.8 ± 1.2  | Isobutane            | 2.2 ± 1.6 | Vinyl acetate       | 2.2 ± 3.1 |
| Tetrachloroethylene  | 1.8 ± 3.3  | Carbon tetrachloride | 1.8 ± 2.3 | Isobutane           | 2.1 ± 1.1 |
| Vinyl acetate        | 1.6 ± 4.1  | Freon 12             | 1.6 ± 1.8 | 2-Methylpentane     | 1.9 ± 2.6 |
| Freon 11             | 1.6 ± 0.7  | Ethylene             | 1.6 ± 1.4 | 2-Butanone          | 1.8 ± 1   |
| Proportion of top 20 | 76.9%      |                      | 70.1%     |                     | 68.95%    |

**Response:** Thank you for your valuable feedback. Table 2 has been updated.

10. Lines 402 – 405: Could you label P1, P2, and P3 in Figure S5? Same for Figure 2.

**Response:** Thank you for your suggestion. The Figure S5 and Figure 2 have been updated as shown below.

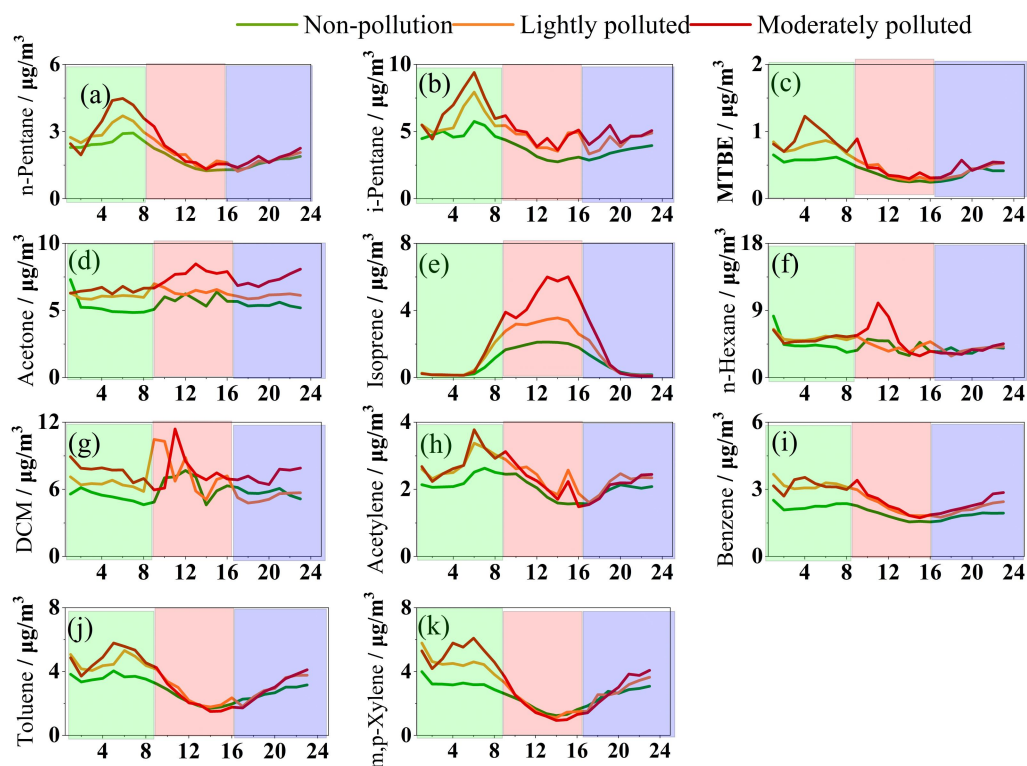

**Fig. 2** Diurnal variations in concentrations of some reactive VOCs species in Zhengzhou under different pollution levels. The light blue, light red, and light green shadows represent stages P1, P2, and P3, respectively.

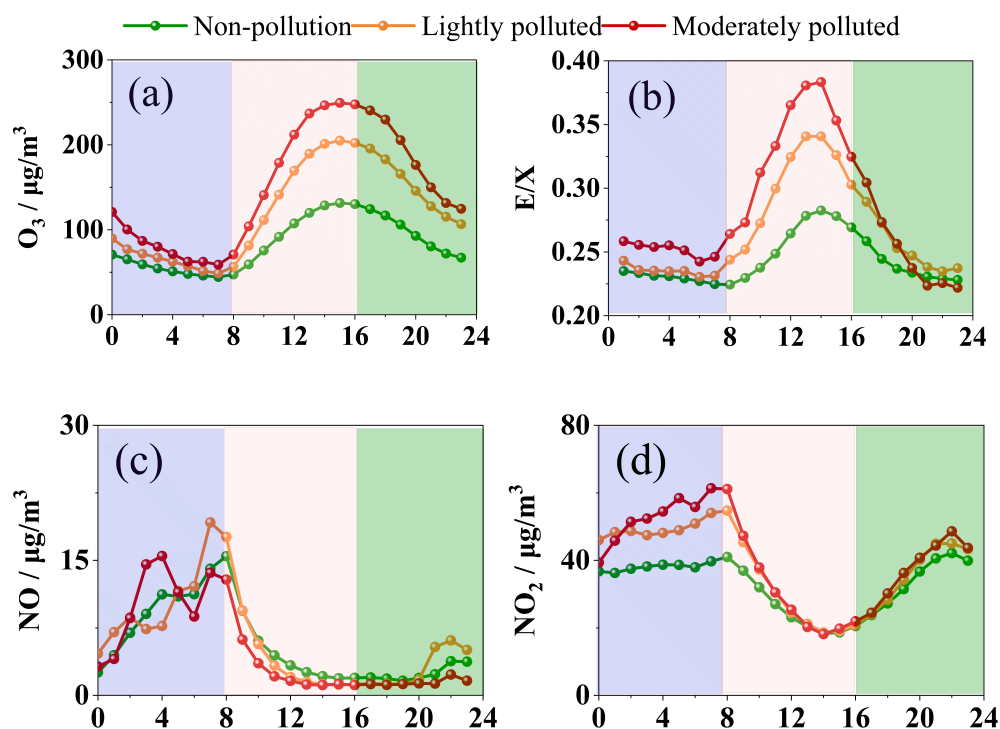

**Fig. S5** Diurnal variation distribution of pollutants during different pollution periods. The light blue, light red, and light green shadows represent stages P1, P2, and P3, respectively.

11. Lines 409 – 412: How did the author determine the correlation between age indicator and O<sub>3</sub> as strong?

**Response:** Thank you for your feedback. Through linear regression analysis of ozone and E/X, a significant correlation was observed under different levels of ozone pollution, with R<sup>2</sup> values greater than 0.7, confirming their strong relationship (as shown in Figure S5).

12. Lines 621: Why was the HONO mixing ratio underestimated? Can it be overestimated? Same question for the HOX.

**Response:** Thank you for your feedback. Since we did not test HONO, the use of the OBM model for simulations leads to an underestimation of the radical concentrations.

13. Figure 9: Could the authors label NO<sub>x</sub> and VOC control zones in the plot? Where is the transition regime?

**Response:** As shown in Figure 9, the ridge line, formed by the turning points of the iso-lines, divides the curve into two distinct regions. Above the ridge line lies the VOCs-controlled region, where ozone concentrations are more sensitive to VOC variations, with little influence from NO<sub>x</sub>. Below the ridge line is the NO<sub>x</sub>-controlled region, where ozone levels are primarily influenced by NO<sub>x</sub> changes, with minimal impact from VOCs. Near the ridge line, the transition regime exists, where both VOCs and NO<sub>x</sub> need to be adjusted to effectively reduce ozone levels.

**Technical Comments:**

1. Make consistent formatting for “NO<sub>x</sub>” and “HO<sub>x</sub>”.

**Response:** Thank you for pointing this out. I have ensured consistent formatting for both "NO<sub>x</sub>" and "HO<sub>x</sub>" throughout the manuscript.

2. Lines 57 – 58: Provide a few references to support the sentence

**Response:** Thank you for your suggestion. The introduction has been rewritten.

3. Line 97: Use another word to replace “escalating”.

**Response:** Thank you for your suggestion. The introduction has been rewritten.

4. Line 136: The abbreviation “VOC” can be used here.

**Response:** Thank you for your suggestion. The introduction has been rewritten.

5. Line 201: Should j be in italic?

**Response:** I have italicized "j" in line 201 as per your suggestion, in accordance with standard scientific notation

6. Lines 213 – 224: They symbols should be consistent in both paragraphs and equations.

**Response:** Accepted.

7. Line 223: Should k be in italic?

**Response:** I have italicized "k" as per your suggestion, in accordance with standard scientific notation

8. Figure S1: What does the small red star stand for? Also, the star is too small to read.

**Response:** Thank you for your suggestion. The small red stars in the figure indicate the locations of the observation stations. Figure S1 has been updated.

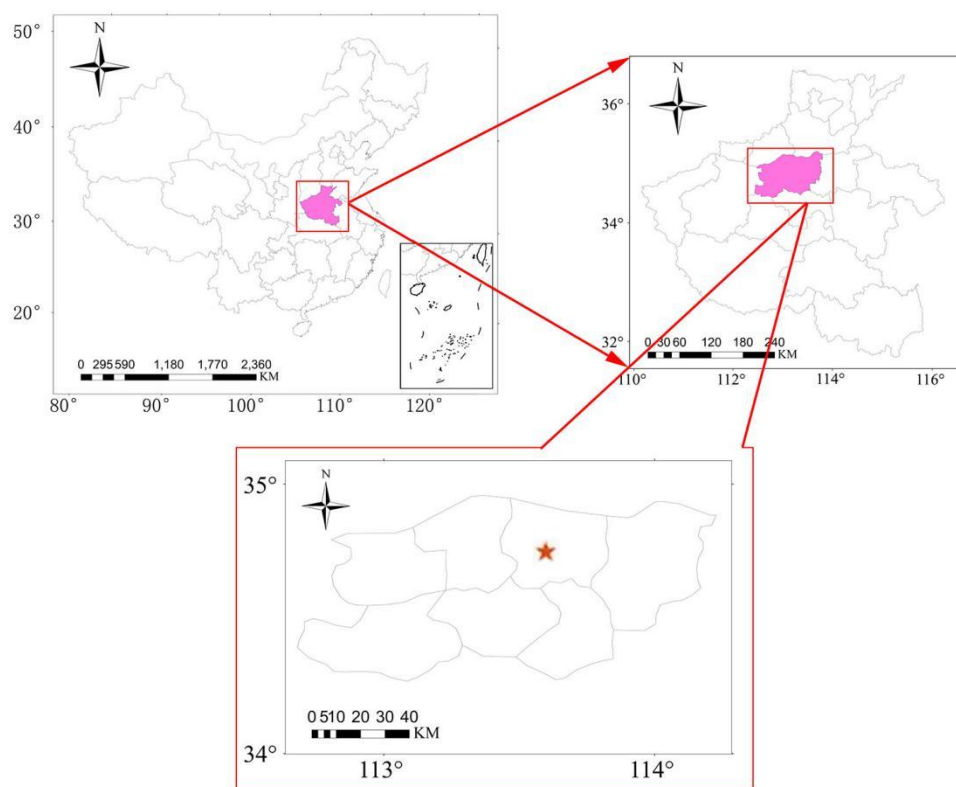

**Fig. S1** Locations of the sampling stations in Zhengzhou.

9. Figure S2: What are d01, d02, d03 and d04? I could not find them in the figure.

**Response:** I sincerely apologize for any inconvenience caused. Figure S2 has been updated. D1, D2, D3 and D4 have horizontal resolutions of 36, 12, 4 and 1 km, respectively.

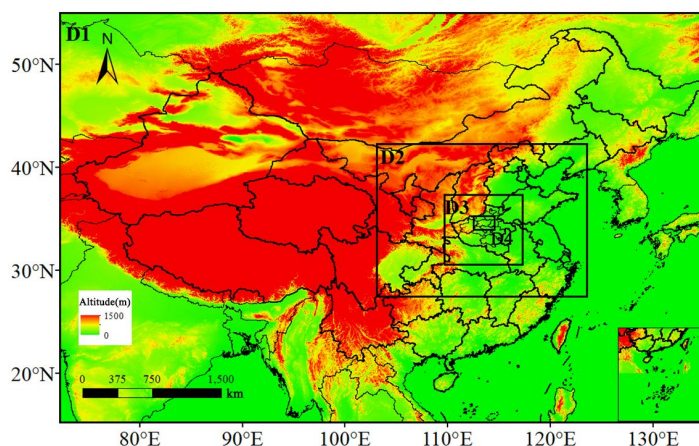

**Fig. S2** Four-level nested domains used in the WRF/CMAQ simulations. D1, D2, D3 and D4 have horizontal resolutions of 36, 12, 4 and 1 km, respectively.

10. Line 264: more accurate than what?

**Response:** Thank you for your valuable feedback. This section has been rewritten as follows: "On the contrary, the simulation of nitrogen dioxide is generally more accurate, as NO<sub>2</sub> is directly emitted, leading to better model performance in simulating NO<sub>2</sub>."

11. Line 291: What does “quality of species” mean?

**Response:** I apologize for the mistake. This has been corrected to concentration.

12. Line 314: Is it supposed to be “ErrorFraction” instead of “Error”?

**Response:** Thank you for your suggestion; it has been corrected.

13. Line 372: similar pattern to what?

**Response:** Thank you for your suggestion. This sentence has been updated to: "PM<sub>10</sub> exhibited a pattern similar to that of NO<sub>x</sub>."

14. Figure 2 and Figure S5: Please use the interquartile range as the error bars.

**Response:** Thank you very much for your valuable feedback. Regarding the error bars, the figures (Figure 2 and Figure S5) present the daily variation distributions of pollutant concentrations under different levels of pollution. Adding error bars would make the figures more cluttered and may hinder the clarity of the information being conveyed. To maintain the simplicity of the figure and to ensure a clear comparison between the different pollution levels, we have chosen not to include error bars at this stage. We believe that presenting all the data in a single figure allows for a more intuitive comparison of the different pollution levels.

However, if you believe that including error bars would enhance the accuracy and readability of the figures, we would be happy to consider splitting the figure into separate ones, adding error bars to each, while still aiming to preserve the comparative effect. Once again, thank you for your feedback, and we look forward to your further guidance.

15. Line 416: What concentration decreased to a minimum?

**Response:** Thank you for your valuable feedback. It should be the O<sub>3</sub> concentration here.

16. Line 453: What is a coordinated control zone?

**Response:** Thank you for your suggestion. To avoid any confusion, this has been corrected to "transition zones."

17. Line 497: I am confused with the part "in order to mitigate O<sub>3</sub> pollution under unfavorable conditions."

**Response:** Thank you for your valuable feedback. The sentence has been deleted to avoid any ambiguity.

18. Figure 4: What do those dots and bars stand for?

**Response:** In Figure 4, the dots represent the proportion of individual substances in the concentration of each factor, while the bars represent the concentration of the substance.

19. Line 595: It should be "cm<sup>3</sup>"

**Response:** Thank you for your suggestion; the changes have been made.

20. Table S2: Where is the data for highly polluted days?

**Response:** Due to the limited number of heavy pollution days (less than 5), there are fewer samples. Therefore, moderate and heavy pollution days were combined for statistical analysis.

21. Line 638: Is it “moderately/highly polluted days” or “moderately and highly polluted days”?

**Response:** Due to the limited number of heavy pollution days (less than 5), there are fewer samples. Therefore, moderate and heavy pollution days were combined for statistical analysis. Therefore, it should be "moderately/highly" here.
